# Supplementary material for: Characterization of a new mitophagy reporter uncovers requirement of BNIP3 for hypoxia-induced mitophagy in Drosophila
Source: Research Square preprint supplement (doi:10.21203/rs.3.rs-9407058/v1), 2026-05-11
Supplement: Supplementary file 1 [file c091694e83ea6864a40e79cb.docx]

**S Figure 1**





**S Figure 2**








**S Figure 3**
